# Supplementary material for: A universal cell‐free DNA approach for response prediction to preoperative chemoradiation in rectal cancer
Source: PubMed Central journal article supplement (PMC10108011; doi:10.1002/ijc.34392), 2022-12-14

## **Supplementary Material**

### **A universal cell-free DNA approach for response prediction to preoperative chemoradiation in rectal cancer**

Albert Grinshpun, Anatoli Kustanovich, Daniel Neiman, Roni Lehmann-Werman, Aviad Zick, Karen Meir, Elez Vainer, Roy Z Granit, Amit Arad, Noa Daskal, Ruth Schwartz, Eli Sapir, Myriam Maoz, Esther Tahover, Josh Moss, Iddo Z Ben-Dov, Tamar Peretz, Ayala Hubert, Ruth Shemer, Yuval Dor

#### **Content:**

- 1. Supplementary Table 1:** Additional clinicopathological characteristics of study population
- 2. Supplementary Figure 1:** Tissue panel of eight colon-specific methylation markers.
- 3. Supplementary Table 2:** Coverage and quality statistics of the targeted bisulfite sequencing analysis. Due to file size, available as separate excel sheet.

**Supplementary Table 1. Additional clinicopathological characteristics of study population**

|                                                                      | No pathCR<br>(n = 30) | PathCR<br>(n = 7) | <i>P</i>           |
|----------------------------------------------------------------------|-----------------------|-------------------|--------------------|
| Total mesorectal excision (%)                                        | 100%                  | 100%              | <i>ns</i>          |
| Low anterior resection/<br>Abdominoperineal<br>resection/unknown (%) | 67%/30%/3%            | 56%/0/44%         | <i>ns</i>          |
| Distal surgical margins<br>involvement <sup>#</sup>                  | 14%                   |                   |                    |
| Circumferential margins<br>involvement <sup>#</sup>                  | 10%                   |                   |                    |
| Lymph node harvest<br>(mean) <sup>§</sup>                            | 19.6                  | 19                | <i>ns</i>          |
| Lymphovascular \ perineural<br>invasion (%) <sup>§</sup>             | 27%                   | 0%                | <i>P &lt; 0.05</i> |
| Mismatch repair deficiency<br>(%) <sup>^</sup>                       | 9.5%                  |                   |                    |

*ns* – not significant

<sup>#</sup> Data not available for 1 patient

<sup>§</sup> Data not available for 2 patients in non-pathCR group and 3 in pathCR group

<sup>^</sup> Data available for 21 patients (70%)

**Supplementary Figure 1: Tissue panel of eight colon-specific methylation markers.**

The percentage of molecules with colon-specific methylation in genomic DNA was obtained from different cell types and tissues. In these experiments, we determined the fraction of molecules that were largely unmethylated across amplified CpG sites.

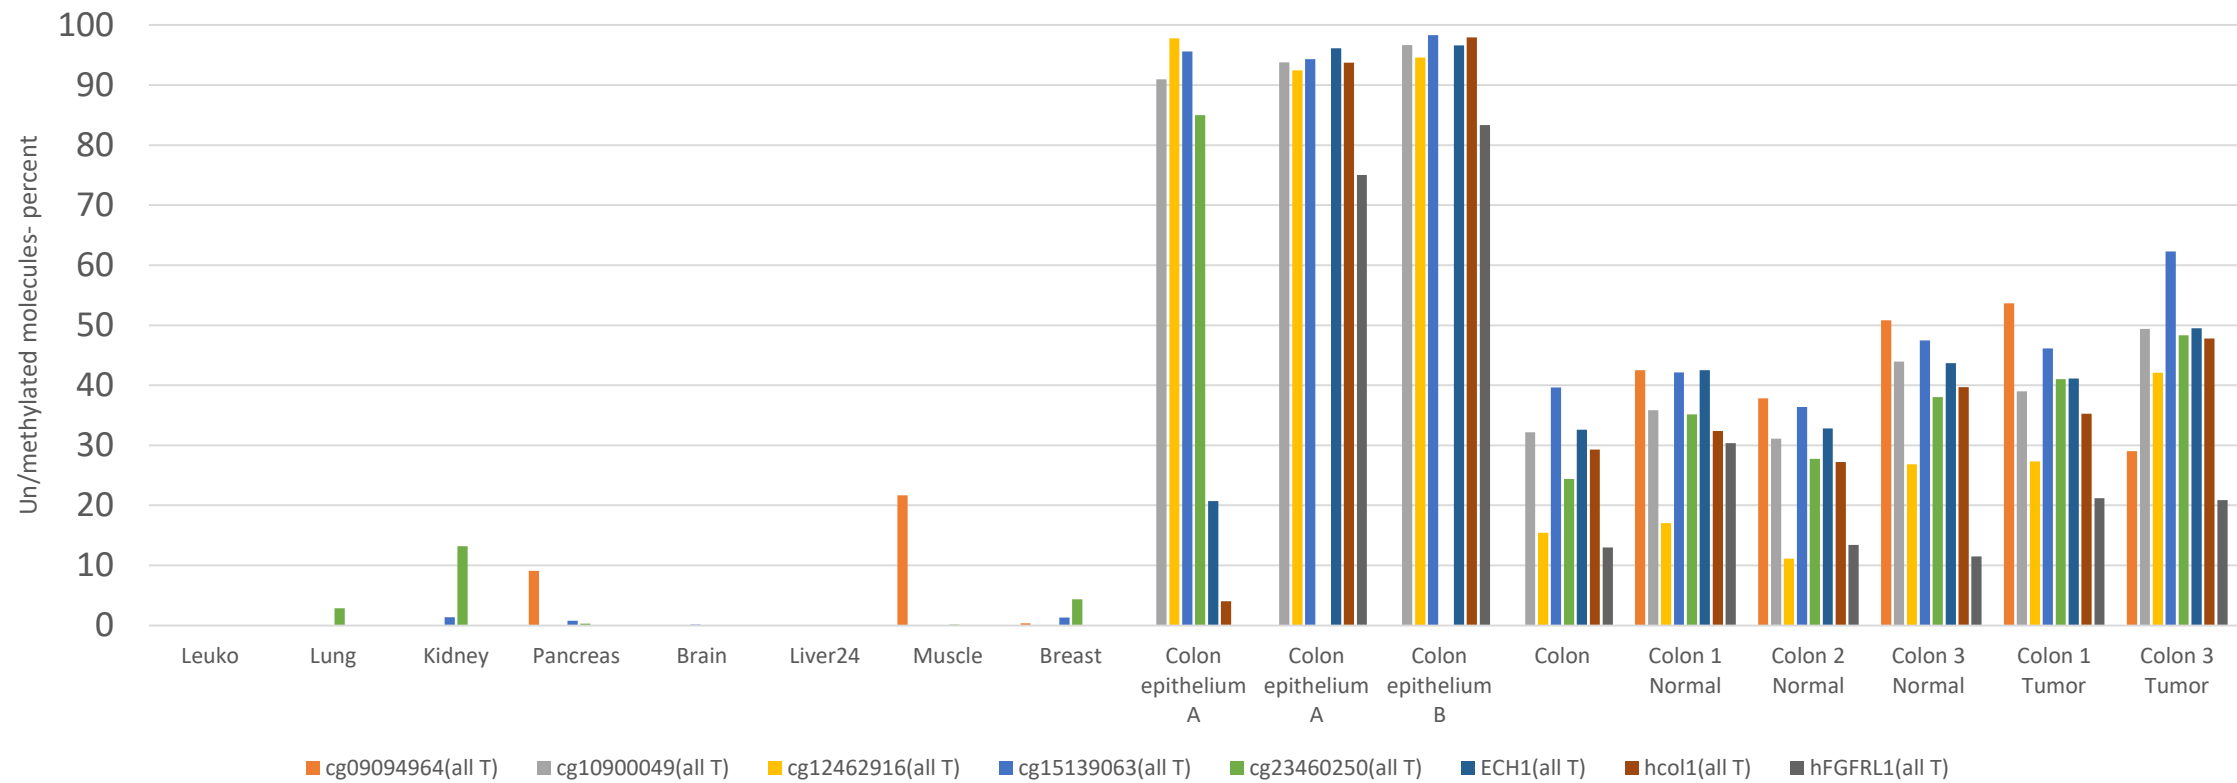

Supplement: IJC-152-1444-s002.pdf [file IJC-152-1444-s002.pdf]
